# Supplementary material for: Seasonal snow–atmosphere modeling: let's do it
Source: Copernicus journal article supplement (doi:10.5194/tc-18-4315-2024), 2024-09-19
Supplement: Supplementary file 1 [file tc-18-4315-2024-supplement.pdf]

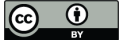

*Supplement of*

## **Seasonal snow–atmosphere modeling: let’s do it**

**Dylan Reynolds et al.**

*Correspondence to:* Dylan Reynolds (dylan.reynolds@slf.ch)

The copyright of individual parts of the supplement might differ from the article licence.

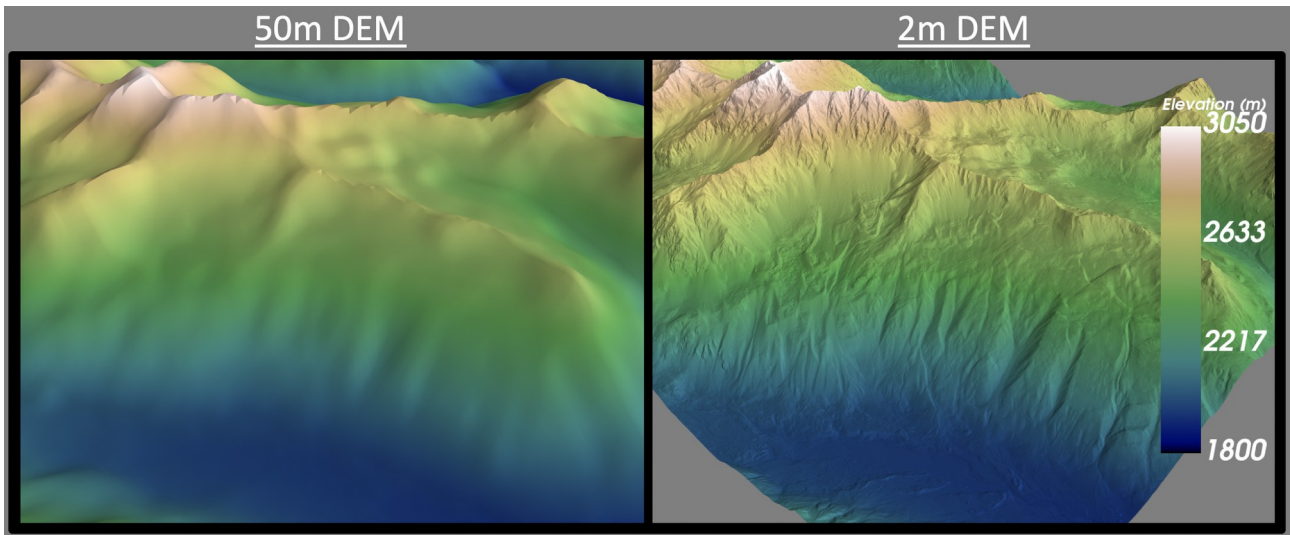

Fig S1: Part of the model domain represented using either a 50m or 2m DEM. The view of the camera is indicated in figure 1 by the purple angle.
